# Supplementary material
Source: PubMed Central journal article supplement (PMC2169276)

**Supplementary Table 1.** Significant relationships between spatial turnover and selected environmental variables, controlling for species richness. There were 7891 degrees of freedom (df) in the case of linear models and 7890 in the case of quadratic models. Methods and abbreviations for estimates of variance explained are as for Table 1. For significant linear and quadratic terms, <sup>+</sup> and <sup>-</sup> indicate positive and negative slopes, respectively, with level of significance coded as: <sup>+++/-</sup>,  $P < 0.001$ ; <sup>++/-</sup>,  $0.001 \leq P < 0.01$ ; <sup>+/-</sup>,  $0.01 \leq P < 0.05$ .

| Effect                         | $\beta_w$            |             | $\beta_{sim}$        |                       | $\beta_i$             |                       |
|--------------------------------|----------------------|-------------|----------------------|-----------------------|-----------------------|-----------------------|
|                                | <i>F</i>             | Pp. expl. D | <i>F</i>             | <i>R</i> <sup>2</sup> | <i>F</i>              | <i>R</i> <sup>2</sup> |
| <i>Mean</i>                    |                      |             |                      |                       |                       |                       |
| Elevation                      | 11.46 <sup>---</sup> | 0.648       | 30.35 <sup>+++</sup> | 0.103                 | —                     | —                     |
| Elevation <sup>2</sup>         | 9.39 <sup>++</sup>   |             | —                    |                       | —                     |                       |
| Habitat diversity              | 36.91 <sup>---</sup> | 0.642       | 16.25 <sup>---</sup> | 0.090                 | 12.02 <sup>---</sup>  | 0.337                 |
| Habitat diversity <sup>2</sup> | —                    |             | 10.18 <sup>++</sup>  |                       | —                     |                       |
| Temperature                    | 47.94 <sup>+++</sup> | 0.660       | —                    | —                     | 138.97 <sup>+++</sup> | 0.368                 |
| Temperature <sup>2</sup>       | 13.46 <sup>---</sup> |             | —                    |                       | —                     |                       |
| NDVI                           | 30.11 <sup>+++</sup> | 0.649       | 24.89 <sup>---</sup> | 0.110                 | 31.64 <sup>---</sup>  | 0.365                 |
| NDVI <sup>2</sup>              | 20.27 <sup>---</sup> |             | —                    |                       | 6.32 <sup>+</sup>     |                       |
| <i>Roughness</i>               |                      |             |                      |                       |                       |                       |
| Elevation                      | *                    | *           | 45.14 <sup>+++</sup> | 0.124                 | 106.34 <sup>+++</sup> | 0.372                 |
| Elevation <sup>2</sup>         | *                    | *           | —                    |                       | —                     |                       |
| Habitat diversity              | 21.31 <sup>+++</sup> | 0.637       | 13.63 <sup>+++</sup> | 0.090                 | 15.46 <sup>+++</sup>  | 0.330                 |
| Habitat diversity <sup>2</sup> | 12.57 <sup>---</sup> |             | 3.95 <sup>-</sup>    |                       | 6.28 <sup>-</sup>     |                       |
| Temperature                    | *                    | *           | 43.03 <sup>+++</sup> | 0.122                 | 93.77 <sup>+++</sup>  | 0.370                 |
| Temperature <sup>2</sup>       | *                    | *           | 5.83 <sup>-</sup>    |                       | 39.02 <sup>---</sup>  |                       |
| NDVI                           | *                    | *           | 18.08 <sup>+++</sup> | 0.104                 | 31.08 <sup>+++</sup>  | 0.362                 |
| NDVI <sup>2</sup>              | *                    | *           | —                    |                       | 5.52 <sup>-</sup>     |                       |

\* Model predictors for which convergence could not be achieved.

**Supplementary Table 2.** F-values and estimates of variance explained for relationships between overall patterns of turnover and the patterns of turnover for each quartile of the species-range size distribution separately. Methods and abbreviations for estimates of variance explained are as for Table 1. In each case there are 8969 degrees of freedom, slopes are positive, and  $P < 0.0001$ .

| Range size quartile | $\beta_w$ |             | $\beta_{sim}$ |                | $\beta_j$ |                |
|---------------------|-----------|-------------|---------------|----------------|-----------|----------------|
|                     | F         | Pp. expl. D | F             | R <sup>2</sup> | F         | R <sup>2</sup> |
| 1                   | 160.7     | 0.019       | 295.0         | 0.070          | 440.5     | 0.014          |
| 2                   | 1197.9    | 0.039       | 453.8         | 0.084          | 1207.5    | 0.088          |
| 3                   | 1848.8    | 0.045       | 1315.8        | 0.171          | 4385.2    | 0.315          |
| 4                   | 3894.6    | 0.047       | 21234.5       | 0.602          | 54184.6   | 0.694          |

**Supplementary Figure 1.** Latitudinal variation in the mean distance between the centroid of a focal cell and that of its immediate neighbours on the equal area Behrmann grid employed in this study.

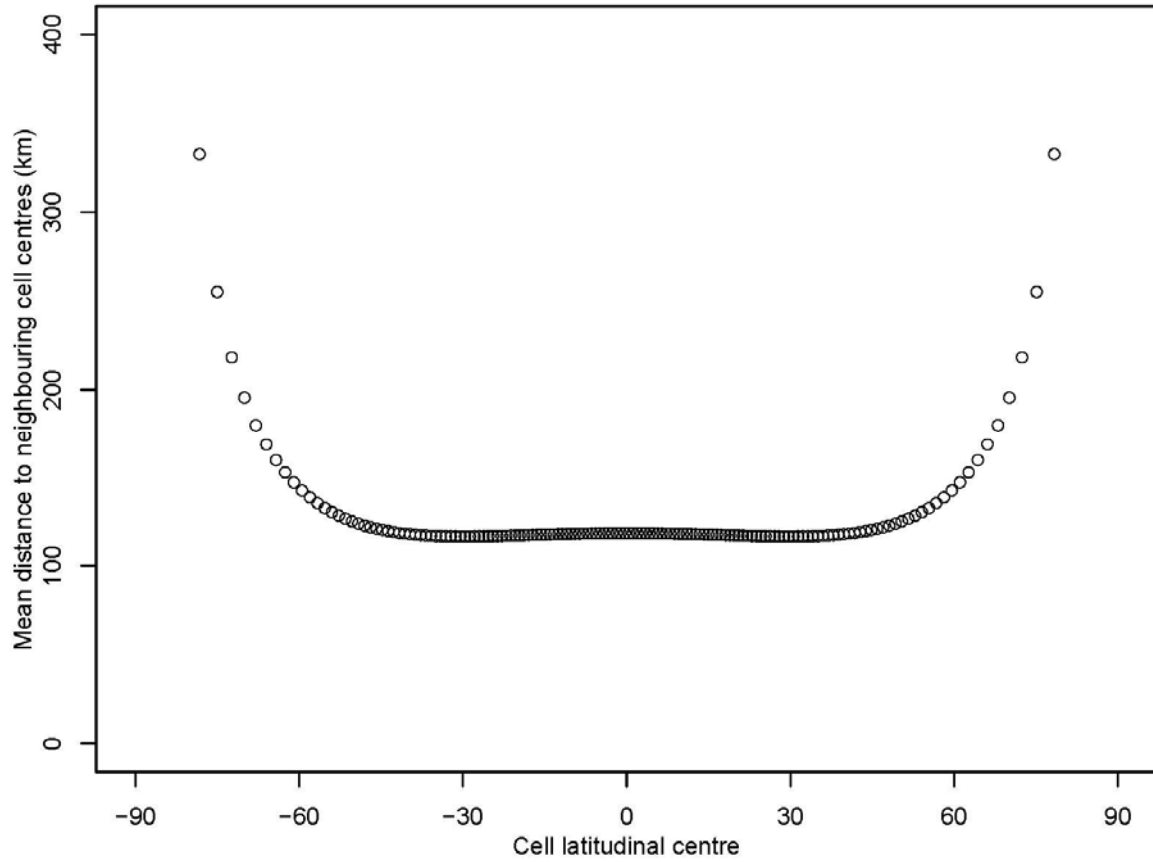

Supplement: rspb20070236s01.pdf [file rspb20070236s01.pdf]
